# Supplementary material for: Association of Body Mass Index With Risk of Early-Onset Colorectal Cancer: Systematic Review and Meta-Analysis
Source: PubMed Central journal article supplement — Am J Gastroenterol. 2021 Jul 23;116(11):2173–83. doi: 10.14309/ajg.0000000000001393 (PMC8560162; doi:10.14309/ajg.0000000000001393), 2021-07-23

**Supplementary Figure 1.** Synthesis of results of studies that could not be included in meta-analysis.

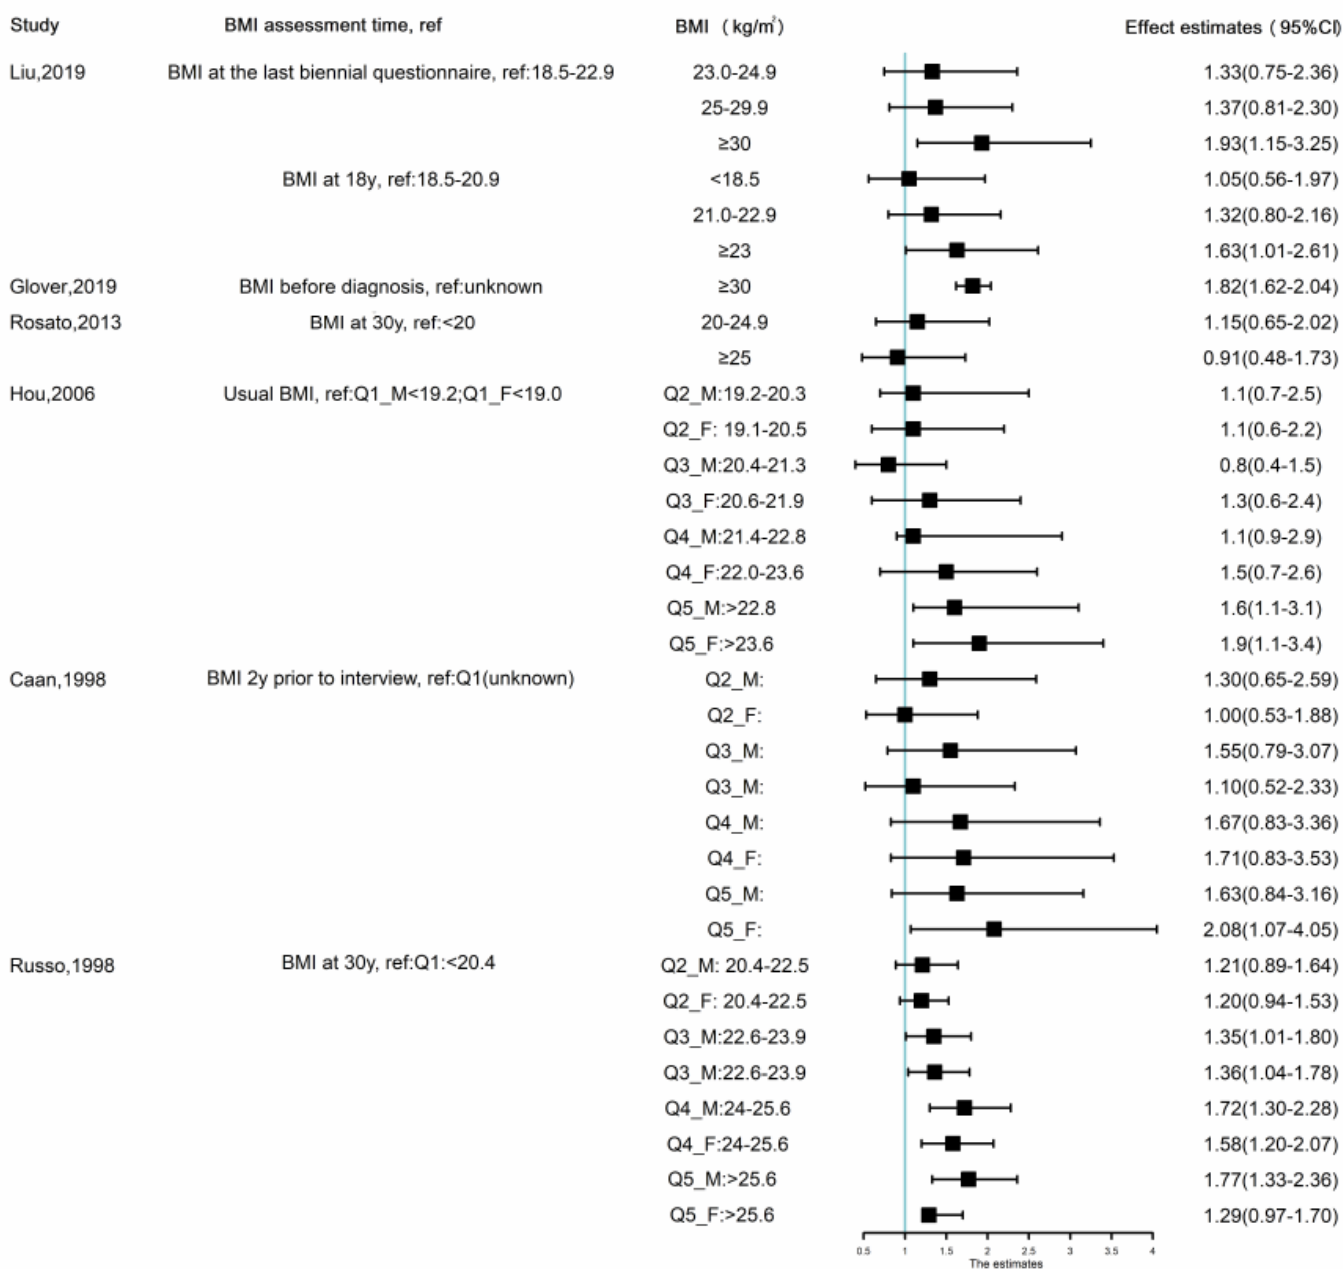

Abbreviations: BMI: body mass index; ref: reference category of BMI; CI: confidence interval; Q: quintile; M:male; F:female

**Supplementary Figure 2.** Association of BMI (overweight and obese vs. normal weight) with colorectal cancer risk in younger adults (<50 years)

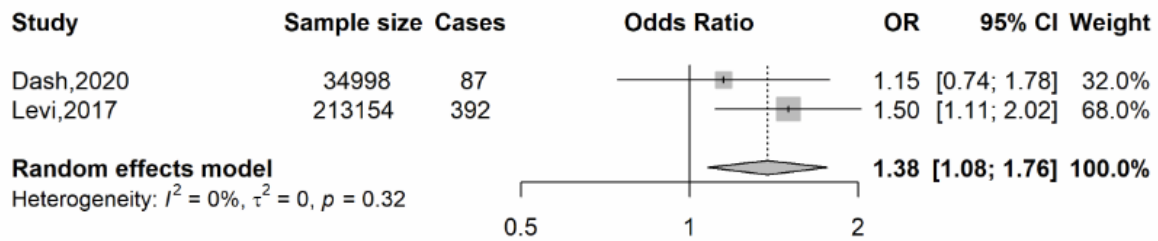

Abbreviations: BMI: Body Mass Index. CI: Confidence interval. OR: Odds Ratio.

Note: BMI Categories: normal weight, 18.5-24.9 kg/m<sup>2</sup> (reference); overweight and obese,  $\geq 25$ kg/m<sup>2</sup>.

**Supplementary Figure 3.** Association of BMI with colorectal cancer risk in younger adults (<50 years): Overweight vs. normal weight

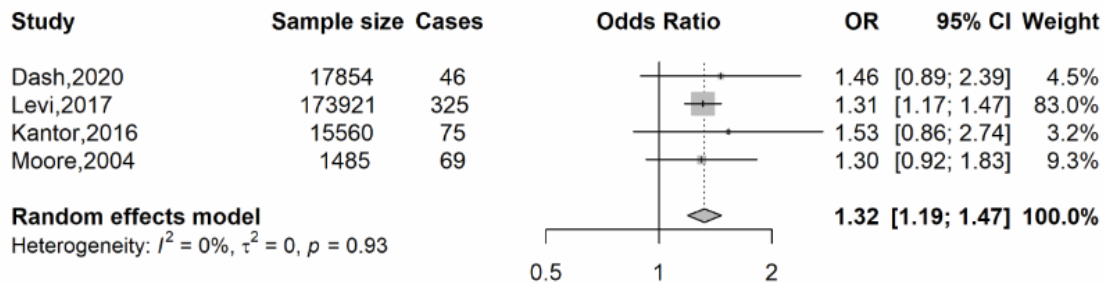

Abbreviations: BMI: Body Mass Index. CI: Confidence interval. OR: Odds Ratio.

Note: BMI Categories: normal weight, 18.5-24.9 kg/m<sup>2</sup> (reference); overweight, 25-29.9 kg/m<sup>2</sup>.

**Supplementary Figure 4.** Association of BMI with colorectal cancer risk in younger adults (<50 years): Obese vs normal weight

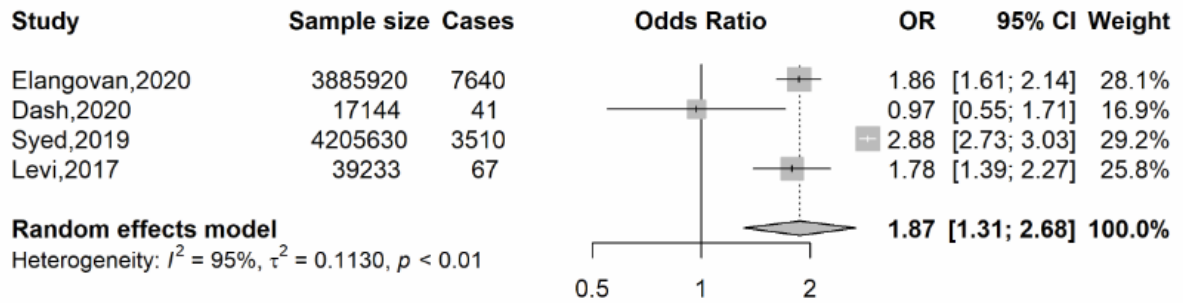

Abbreviations: BMI: Body Mass Index. CI: Confidence interval. OR: Odds Ratio.  
 Note: BMI Categories: normal weight, 18.5-24.9 kg/m<sup>2</sup> (reference); obese  $\geq 30$  kg/m<sup>2</sup>.

**Supplementary Figure 5.** Funnel plots for evaluating potential publication bias

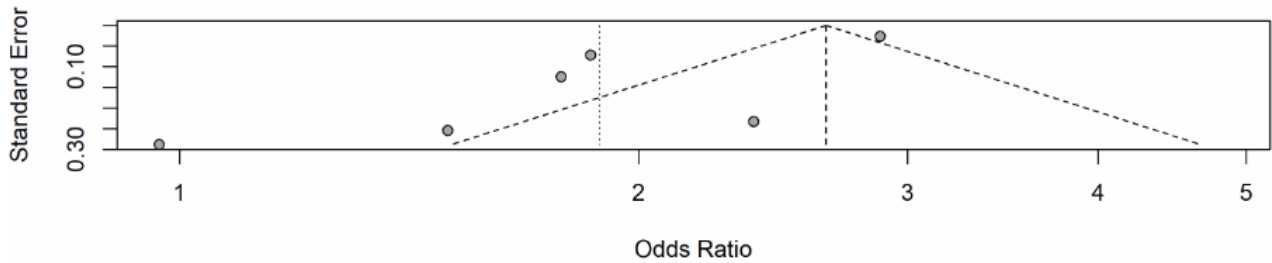

Supplement: acg-116-2173-s001.pdf [file acg-116-2173-s001.pdf]
